# Supplementary material for: Mesoporous silica nanoplates facilitating fast Li+ diffusion as effective polysulfide-trapping materials for lithium–sulfur batteries
Source: Royal Society of Chemistry journal article supplement (doi:10.1039/c8ta11446c), 2019-01-01
Supplement: c8ta11446c1.pdf [file c8ta11446c1.pdf]

Copyright WILEY-VCH Verlag GmbH & Co. KGaA, 69469 Weinheim, Germany, 2016.

## Supporting Information

### **Mesoporous Silica Nanoplates Facilitating Fast Li<sup>+</sup> Diffusion as Effective Polysulfide-trapping Materials for Lithium-Sulfur Batteries**

*Xiao Xiang<sup>a</sup>, Jing Yi Wu<sup>a</sup>, Qing Xuan Shi<sup>a</sup>, Qing Xia<sup>a</sup>, Zhi Gang Xue<sup>a</sup>, Xiao Lin Xie<sup>a</sup> and Yun Sheng Ye<sup>a\*</sup>*

Key Laboratory of Material Chemistry for Energy Conversion and Storage, Ministry of Education, School of Chemistry and Chemical Engineering, Huazhong University of Science and Technology, Wuhan 430074, China

\*E-mail: ysye@hust.edu.cn

## Electrochemical measurements

Linear sweep voltammetry (LSV) was carried out on an electrolyte-soaked separator sandwiched between Li metal and stainless steel with a scan rate of 10 mV s<sup>-1</sup> on an AUTOLAB impedance analyzer.

The Li-ion diffusion coefficient was evaluated by a series cyclic voltammetry (CV) scans with various scan rates from 0.1 to 0.5 mV s<sup>-1</sup> and calculated by the Randles-Sevcik equation as follows:

$$I_p = 2.69 \times 10^5 n^{3/2} A D_{Li^+}^{1/2} C_{Li^+} v^{1/2} \quad (S1)$$

Where  $I_p$  is the peak current,  $n$  is the number of electrons transferred in the reaction ( $n=2$  for Li-S batteries),  $A$  is the electrode area,  $D_{Li^+}$  is the Li-ion diffusion coefficient,  $C_{Li^+}$  is the change in the concentration of Li-ion, and  $v$  is the scan rate. The set-up for CV tests are as follows: Upper vertex potential (V): 3.000, Lower vertex potential (V): 1.500, Stop potential (V): 2.950, Number of stop crossings: 10, Step potential (V): 0.00500.

## Characterization

Thermogravimetric analysis (TGA) was performed on Q50. Samples were heated from 30 to 500 °C with a rate of 10 °C min<sup>-1</sup> under nitrogen at 10 mL min<sup>-1</sup> and kept for an hour at 500 °C, after that, heating was continued to 800 °C. The specific area was calculated from the adsorption data in the relative pressure interval from 0.04 to 0.2 using the Brunauer-Emmett-Teller (BET) method. UV-Visible spectra were measured by a Evolution 220, Thermo Scientific spectrophotometer. The stabilities and discharge-charge performances of the cells were tested with a programmable battery cycler (LAND Electronic Co. Ltd). The cyclic voltammogram data were collected with a Solartron at a scan rate of 0.01 to 0.05 mV s<sup>-1</sup> in a voltage window of 2.6–1.7 V. The coating thickness was measured by a stylus profiler (DektakXT, Bruker). Electrochemical impedance spectroscopy plots were collected with a Solartron Impedance Analyzer. Morphological characterizations of MSiNP and SiNPs were collected by scanning

electron microscope (SEM, Hitachi S-4700), energy-dispersive X-ray spectroscopy (EDX) elemental mapping (FEI Nova NanoSEM450) and transmission electron microscope (TEM, JEOL JEM-1200CX-II). X-ray photoelectron spectroscopy (XPS) [ESCA 2000 (VG Microtech)] tests were using a monochromatized AlK $\alpha$  anode.

### Characterization of weittibility and retainability

The electrolyte uptake (*EU*) was calculated by soaking weighed pristine S-electrode and S-electrode coated with FSiNP and FMSiNP in the electrolyte at 30 °C for 1 h. The EU values were determined by:

$$EU (\%) = (W_S - W_I) / W_I \times 100\% \quad (S2)$$

Where  $W_I$  and  $W_S$  are the weight of the initial cathode and cathode after soaking in the electrolyte, respectively.

The electrolyte retention (*ER*) was determined by setting soaked cathodes in an oven at 30 °C for 0.2, 0.4 and 12 h. The *ER* values were calculated by:

$$ER (\%) = 100\% - (W_s - W_D) / W_s \times 100\% \quad (S3)$$

Where  $W_s$  is the cathode after soaking in the electrolyte;  $W_D$  is the weight of soaked cathode after deposition in an oven at 30 °C .

**Table S1.** The electrolyte uptakes (EUs) and retention of S-electrode coated with FSiNP, MSiNP, FMSiNP and prinstine S-electrode.

|              | PP   | FSiNP | FMSiNP |
|--------------|------|-------|--------|
| EU (%)       | 46.3 | 46.2  | 50     |
| ER (0.2 h %) | 0.96 | 0.96  | 0.97   |
| ER (0.4 h %) | 0.94 | 0.94  | 0.96   |
| ER (12 h %)  | 0.93 | 0.92  | 0.95   |

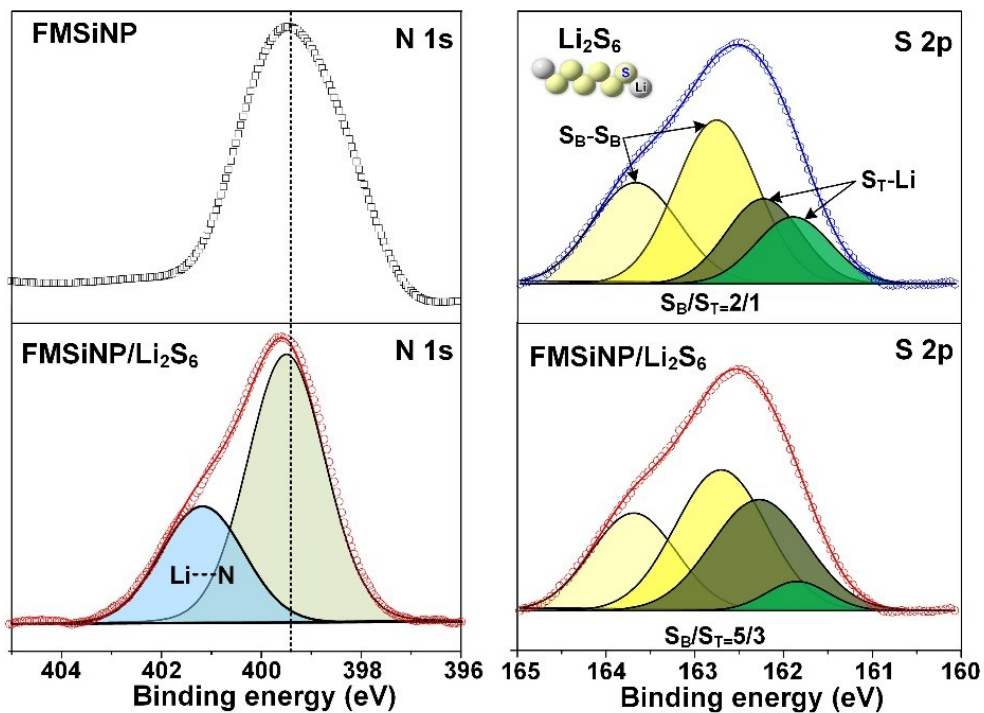

**Figure S1.** N 1s XPS spectra of (a) FMSiNP and (b) FMSiNP/Li<sub>2</sub>S<sub>6</sub>. S 2p XPS spectra of (c) Li<sub>2</sub>S<sub>6</sub> and FMSiNP/Li<sub>2</sub>S<sub>6</sub>.

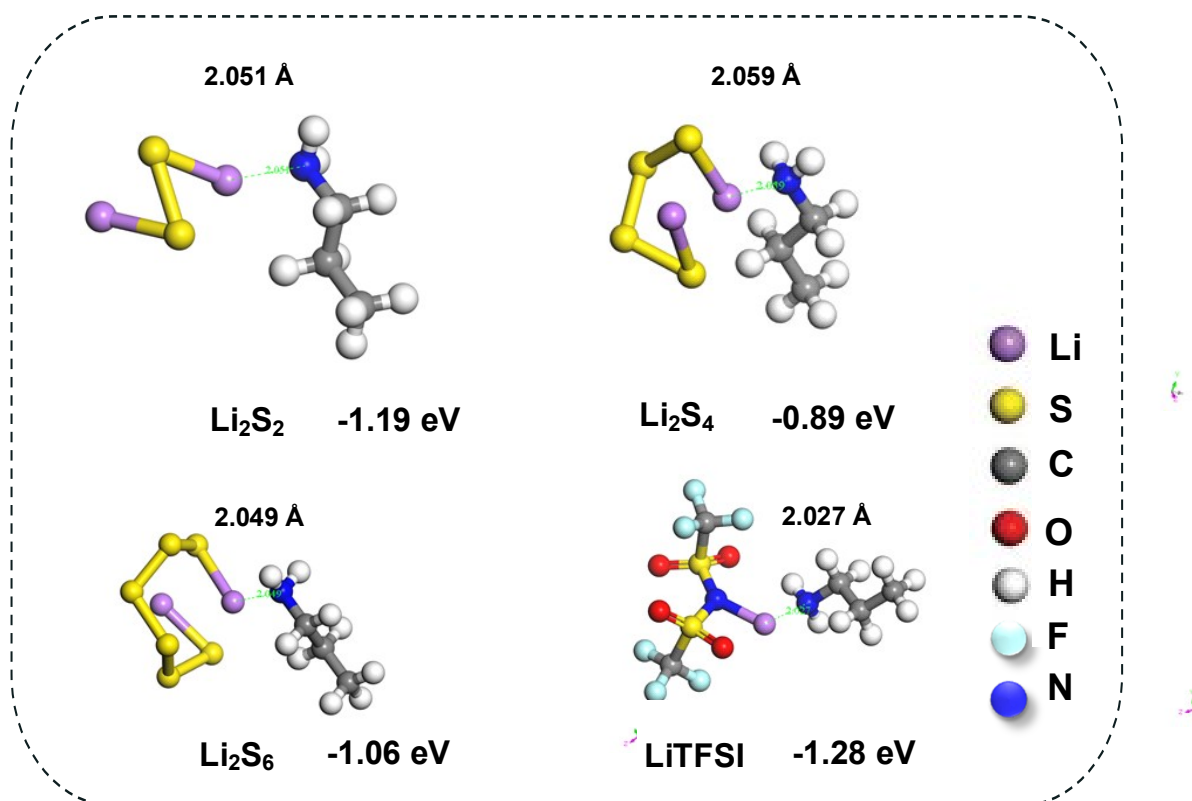

**Figure S2.** Molecular models of the interaction between FMSiNP and Li<sub>2</sub>S<sub>2</sub>, Li<sub>2</sub>S<sub>4</sub>, Li<sub>2</sub>S<sub>6</sub> and LiTFSI by DFT calculations.

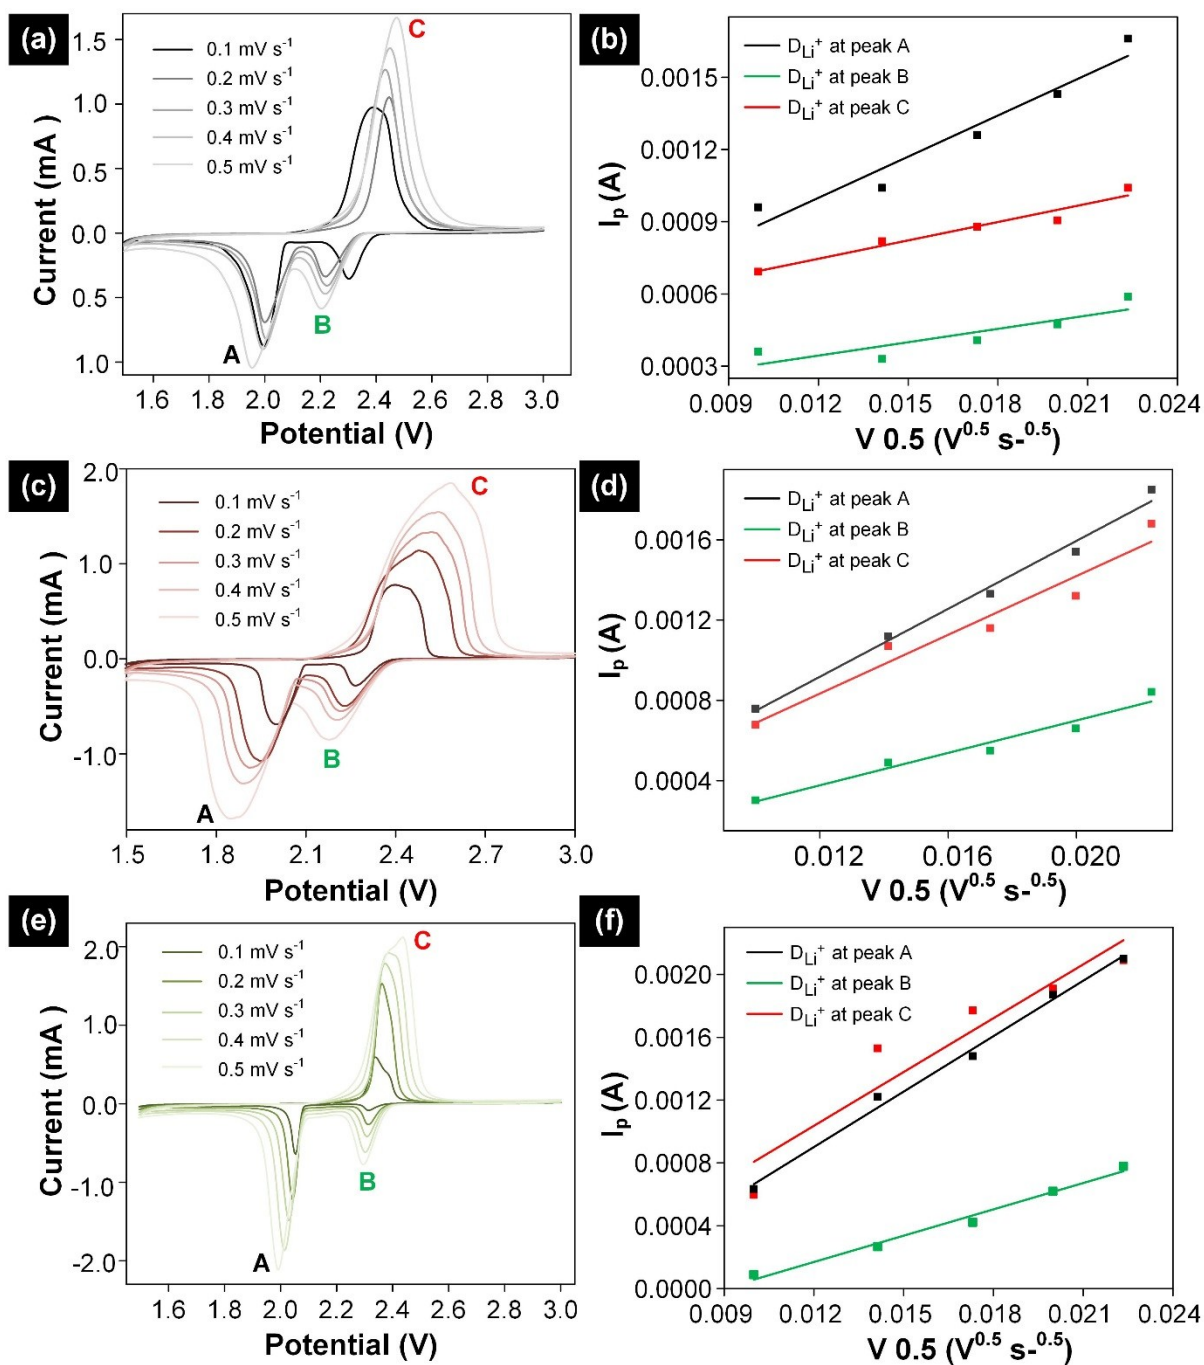

**Figure S3.** CVs at various scan rates and the linear fitting of the peak currents with the square root of the scan rates for the (a, b) Celgard separator, (c, d) FSiNP- and (e, f) FMSiNP-coated interlayers.

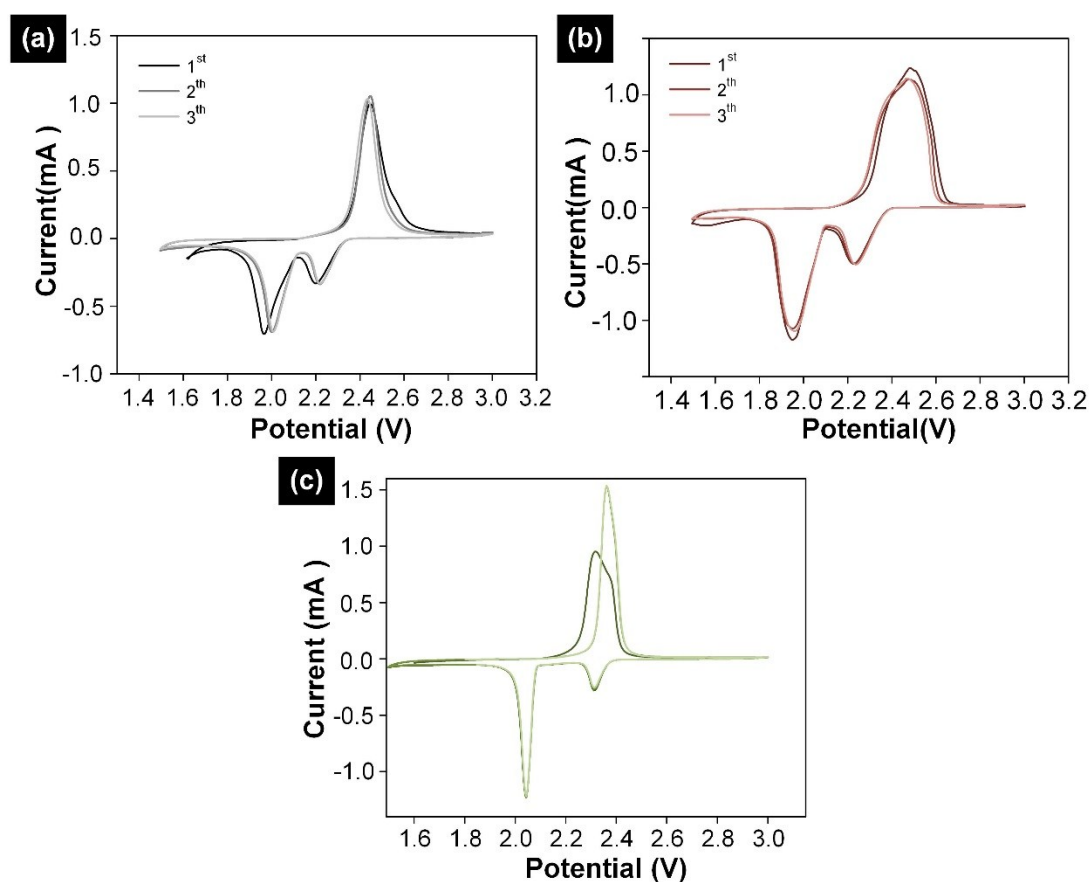

**Figure S4.** CV curves of (a) Celgard separator, (b) FSiNP- and (c) FMSiNP-coated interlayers swept in the voltage range of 1.3-3.2 V.

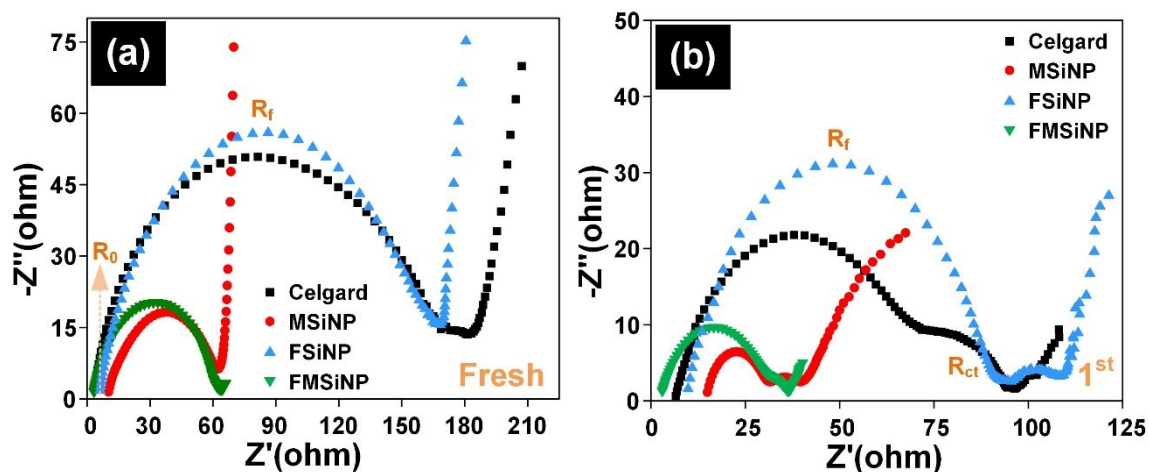

**Figure S5.** The Nyquist plots (a) the fresh cells without/with interlayers at a current of 0.5 C and (b) the cells after 10 cycles.

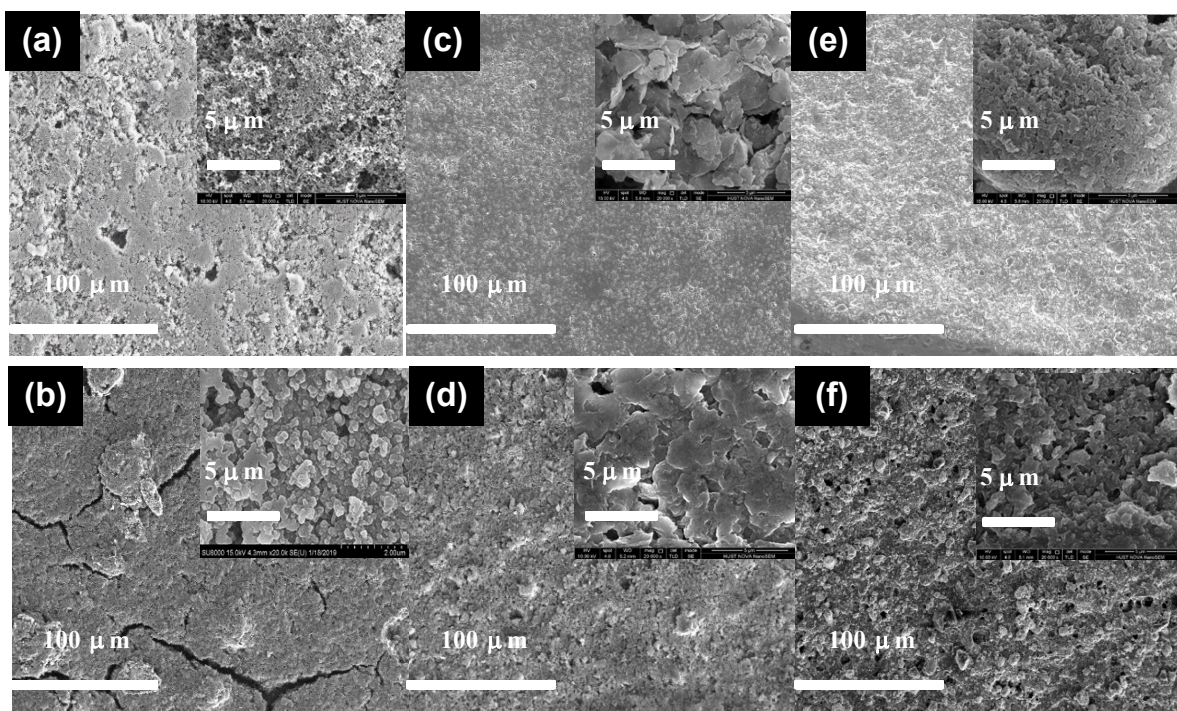

**Figure S6.** SEM images of (a) pristine S-electrode, S-electrode with (c) FSiNP and (e) FMSiNP before cycling; SEM images of (b) pristine S-electrode, S-electrode with (d) FSiNP and (f) FMSiNP after 100 cycles.

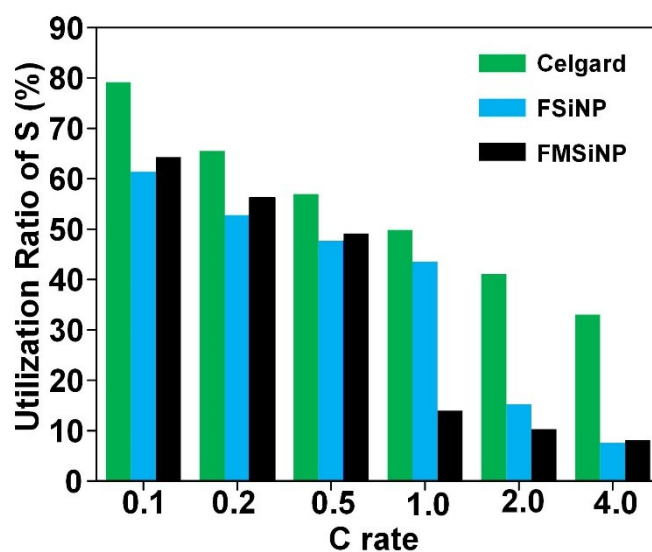

**Figure S7.** Utilization of the active materials of the cells without/with interlayers at various current ranges from 0.1 to 4.0 C.

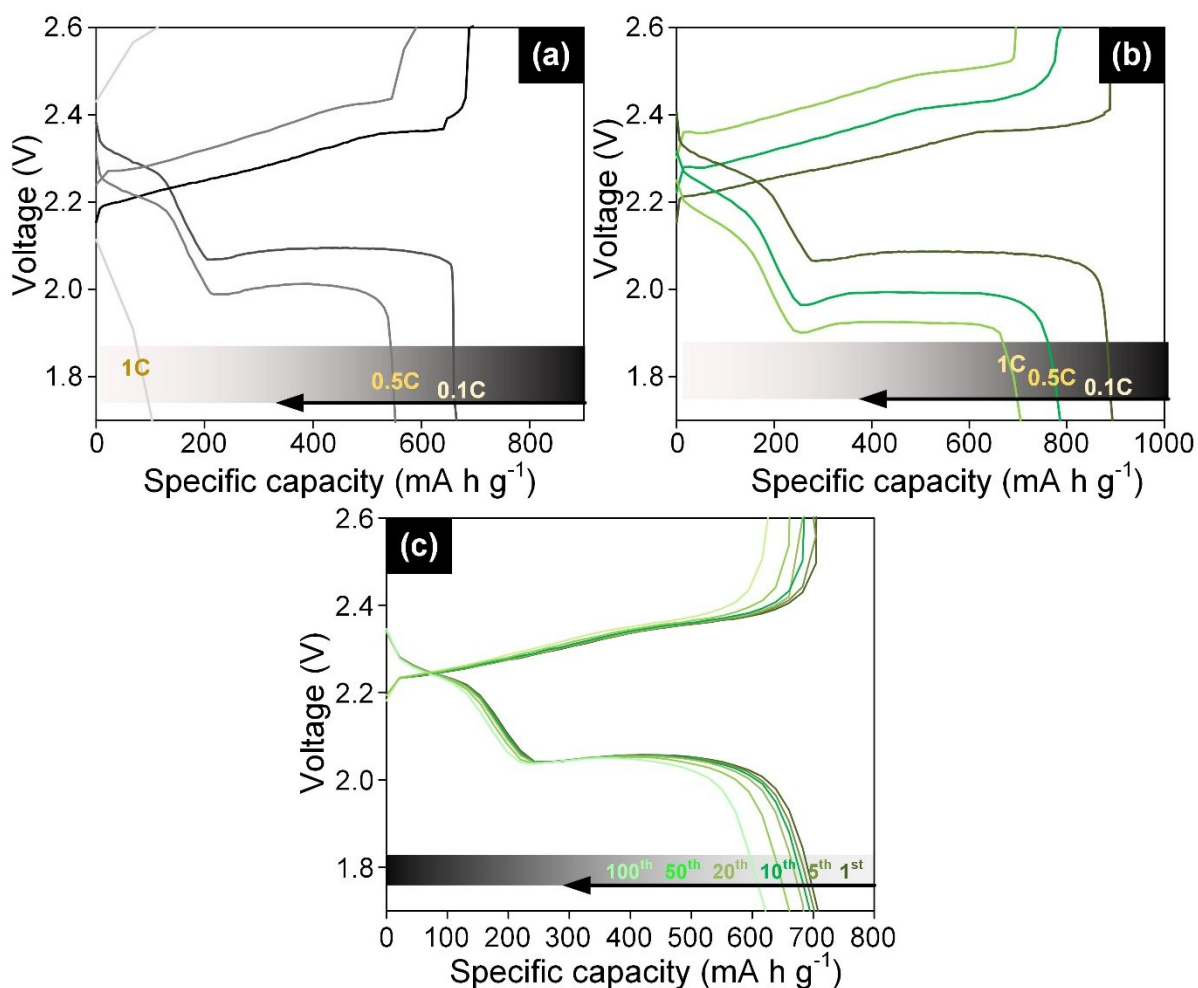

**Figure S8.** Discharge-charge profiles of (a) the pristine high-S loading cell and cells with (b) FMSiNP interlayer at various current ranges from 0.1 to 1.0 C; (c) Discharge-charge profiles of the high-S loading cell with FMSiNP interlayer at a rate of 1.0 C.

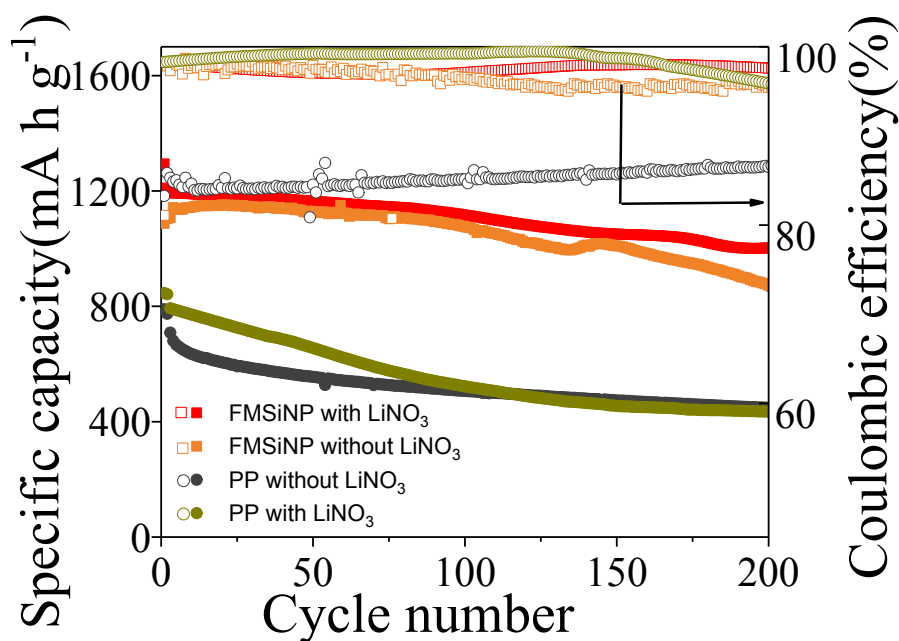

**Figure S9.** Electrochemical performance of the cells with/without FMSiNP interlayer using the electrolyte with/without LiNO<sub>3</sub> additive at a rate of 0.5 C.



**Table S2.** Performance comparison of the functional separators/or interlayers in recent publications.

| Materials                                            | Preparation method | Function                                             | Electrochemical performance (initial capacity and degradation rate) | Cathode composition(sulfur content and areal loading)           | Ref.      |
|------------------------------------------------------|--------------------|------------------------------------------------------|---------------------------------------------------------------------|-----------------------------------------------------------------|-----------|
| SRGO                                                 | Vacuum filtration  | Electrostatic Repulsive Interaction                  | 1300 mAh g <sup>-1</sup> at 0.5C<br>0.15 % for 250 cycles           | Ketjen Black/S<br>50 wt.%/1.3 mg cm <sup>-2</sup>               | S1        |
| MCNF                                                 | Electrospinning    | physically polysulfde-anchor                         | 1549 mA h g <sup>-1</sup> at 0.5C<br>0.17 % for 100 cycles          | Pure sulfur<br>60 wt.%/1.4 mg cm <sup>-2</sup>                  | S2        |
| PANI-GO                                              | Resting            | Chemical interaction                                 | 1261 mA h g <sup>-1</sup> at 0.5C<br>0.18 % for 150 cycles          | Ketjen Black/S<br>49 wt.%/1.96 mg cm <sup>-1</sup>              | S3        |
| PEDOT:PS S                                           | Spraying           | Electrostatic Repulsive Interaction                  | 985 mA h g <sup>-1</sup> at 0.25C<br>0.036 % for 1000 cycles        | S-G<br>40 wt.%/1.1 mg cm <sup>-1</sup>                          | S4        |
| TiO <sub>2</sub> /C                                  | Electrospinning    | Chemical adsorption                                  | 1238 mAh g <sup>-1</sup> at 0.2C<br>0.13 % for 300 cycles           | S/MWCNT<br>49 wt.%/3 mg cm <sup>-2</sup>                        | S5        |
| MWCNT                                                | Self assembly      | physically polysulfde-anchor                         | 851 mAh g <sup>-1</sup> at 0.5C<br>0.042 % for 100 cycles           | Pure sulfur<br>80 wt.%/3 mg cm <sup>-2</sup>                    | S6        |
| Polypyrrole nanotube film(PYNF)                      | Vacuum filtration  | Chemical adsorption                                  | 1102 mAh g <sup>-1</sup> at 0.5C<br>0.11 % for 300 cycles           | Ketjen Black/S<br>53 wt.%/3 mg cm <sup>-2</sup>                 | S7        |
| Carbonized sucrose-coated eggshell membranes (CSEMs) | Template method    | physically polysulfde-anchor                         | 1327 mAh g <sup>-1</sup> at 0.1C<br>0.25 % for 100 cycles           | CSEM/ Li <sub>2</sub> S <sub>6</sub><br>3.2 mg cm <sup>-2</sup> | S8        |
| PAN-NC                                               | Electrospinning    | Chemical adsorption                                  | 1279 mAh g <sup>-1</sup> at 0.2C<br>0.05 % for 100 cycles           | Pure sulfur<br>60 wt.%/2.0 mg cm <sup>-2</sup>                  | S9        |
| Graphene-embedded carbon fiber (GFC)                 | Vacuum filtration  | Chemical adsorption                                  | 1138 mAh g <sup>-1</sup> at 1C<br>0.13 % for 300 cycles             | Pure sulfur<br>60 wt.%/2.0 mg cm <sup>-2</sup>                  | S10       |
| FBN/G                                                | Blading            | Chemical adsorption                                  | 1100 mAh g <sup>-1</sup> at 3C<br>0.0037 % for 1000 cycles          | CNT/S<br>60 wt.%/1.5-3.0 mg cm <sup>-2</sup>                    | S11       |
| High-Flux Graphene Oxide                             | Blading            | physically polysulfde-anchor                         | 1182 mAh g <sup>-1</sup> at 0.5C<br>0.29 % for 100 cycles           | NPC/S<br>80 wt.%/ 1.2 mg cm <sup>-2</sup>                       | S12       |
| FMSiNP                                               | Blading            | Chemical adsorption and physically polysulfde-anchor | 1294 mAh g <sup>-1</sup> at 1.0C<br>0.038 % for 1500 cycles         | CB/S<br>60 wt.%/ 1.2-1.6 mg cm <sup>-2</sup>                    | This work |

## References

- S1. Lu, Y.; Gu, S.; Guo, J.; Rui, K.; Chen, C.; Zhang, S.; Jin, J.; Yang, J.; Wen, Z., Sulfonic Groups Originated Dual-Functional Interlayer for High Performance Lithium-Sulfur Battery. *ACS Appl Mater Interfaces* 2017, 9 (17), 14878-14888.
- S2. Singhal, R.; Chung, S.-H.; Manthiram, A.; Kalra, V., A free-standing carbon nanofiber interlayer for high-performance lithium-sulfur batteries. *Journal of Materials Chemistry A* 2015, 3 (8), 4530-4538.
- S3. Yin, L.; Dou, H.; Wang, A.; Xu, G.; Nie, P.; Chang, Z.; Zhang, X., A functional interlayer as a polysulfides blocking layer for high-performance lithium-sulfur batteries. *New Journal of Chemistry* 2018, 42 (2), 1431-1436.

- S4. Abbas, S. A.; Ibrahem, M. A.; Hu, L.-H.; Lin, C.-N.; Fang, J.; Boopathi, K. M.; Wang, P.-C.; Li, L.-J.; Chu, C.-W., Bifunctional separator as a polysulfide mediator for highly stable Li-S batteries. *Journal of Materials Chemistry A* 2016, 4 (24), 9661-9669.
- S5. Zhao, T.; Ye, Y.; Lao, C. Y.; Divitini, G.; Coxon, P. R.; Peng, X.; He, X.; Kim, H. K.; Xi, K.; Ducati, C.; Chen, R.; Liu, Y.; Ramakrishna, S.; Kumar, R. V., A Praline-Like Flexible Interlayer with Highly Mounted Polysulfide Anchors for Lithium-Sulfur Batteries. *Small* 2017, 13 (40).
- S6. Kim, H. M.; Hwang, J. Y.; Manthiram, A.; Sun, Y. K., High-Performance Lithium-Sulfur Batteries with a Self-Assembled Multiwall Carbon Nanotube Interlayer and a Robust Electrode-Electrolyte Interface. *ACS Appl Mater Interfaces* 2016, 8 (1), 983-7.
- S7. Ma, G.; Wen, Z.; Wang, Q.; Shen, C.; Peng, P.; Jin, J.; Wu, X., Enhanced performance of lithium sulfur battery with self-assembly polypyrrole nanotube film as the functional interlayer. *Journal of Power Sources* 2015, 273, 511-516.
- S8. Chung, S. H.; Manthiram, A., Carbonized eggshell membrane as a natural polysulfide reservoir for highly reversible Li-S batteries. *Adv Mater* 2014, 26 (9), 1360-5.
- S9. Peng, Y.; Zhang, Y.; Wang, Y.; Shen, X.; Wang, F.; Li, H.; Hwang, B. J.; Zhao, J., Directly Coating a Multifunctional Interlayer on the Cathode via Electrospinning for Advanced Lithium-Sulfur Batteries. *ACS Appl Mater Interfaces* 2017, 9 (35), 29804-29811.
- S10. Chai, L.; Wang, J.; Wang, H.; Zhang, L.; Yu, W.; Mai, L., Porous carbonized graphene-embedded fungus film as an interlayer for superior Li-S batteries. *Nano Energy* 2015, 17, 224-232.
- S11. Fan, Y.; Yang, Z.; Hua, W.; Liu, D.; Tao, T.; Rahman, M. M.; Lei, W.; Huang, S.; Chen, Y., Functionalized Boron Nitride Nanosheets/Graphene Interlayer for Fast and Long-Life Lithium-Sulfur Batteries. *Advanced Energy Materials* 2017, 7 (13), 1602380.
- S12. Shaibani, M.; Akbari, A.; Sheath, P.; Easton, C. D.; Banerjee, P. C.; Konstas, K.; Fakhfour, A.; Barghamadi, M.; Musameh, M. M.; Best, A. S.; Ruther, T.; Mahon, P. J.; Hill, M. R.; Hollenkamp, A. F.; Majumder, M., Suppressed Polysulfide Crossover in Li-S Batteries through a High-Flux Graphene Oxide Membrane Supported on a Sulfur Cathode. *ACS Nano* 2016, 10 (8), 7768-79.
